# Supplementary material for: Introducing an on-site Helicopter Emergency Medical Service (HEMS) physician at the Emergency Medical Communication Centre - implications for dispatch precision at a Norwegian HEMS base
Source: Springer Nature journal article supplement (doi:10.1186/s13049-025-01396-1), 2025-05-07
Supplement: MOESM1 [file 13049_2025_1396_MOESM1_ESM.pdf]

**Additional file 1. Baseline data for HEMS patients in intervention and non-intervention periods**

| Factor            | Unit       | Intervention versus non-intervention, Estimate (95% CI) |
|-------------------|------------|---------------------------------------------------------|
| Age               | Years      | -3.2 (-8.7 to 2.3)                                      |
| Woman             | %-point RD | -5.5 (-15.5 to 4.6)                                     |
| ICD-10, chapter I | %-point RD | -3.3 (-13.8 to 7.1)                                     |
| ICD-10, chapter J | %-point RD | -1.1 (-6.8 to 4.5)                                      |
| ICD-10, chapter S | %-point RD | 7.7 (0.1 to 15.4)                                       |
| ICD-10, chapter R | %-point RD | 2.3 (-4.7 to 9.4)                                       |

ICD: International Classification of Diseases, RD: Risk difference
